# Supplementary material for: An optofluidic antenna for enhancing the sensitivity of single-emitter measurements
Source: Research Square preprint supplement (doi:10.21203/rs.3.rs-2497202/v1), 2023-01-27
Supplement: Supplementary file 1 [file e1c61d01ef6bdf73c781df4c.pdf]

# I. SUPPLEMENTARY INFORMATION

## CONTENTS

|    |                                                                  |    |
|----|------------------------------------------------------------------|----|
| 1  | I. Supplementary information                                     | 1  |
| 2  | A. Experimental assembly of the optofluidic antenna              | 1  |
| 3  | B. Distribution of the excitation light in the antenna           | 1  |
| 4  | C. Monte-Carlo simulations of the molecular diffusion            | 2  |
| 5  | D. Calculation of the molecular detection efficiency (MDE)       | 4  |
| 6  | E. Photon collection enhancement at the water/air interface      | 6  |
| 7  | F. Fluorescence correlation spectroscopy                         | 8  |
| 8  | G. Diffusion of differently charged dye molecules inside the OFA | 8  |
| 9  | H. Multiparameter Fluorescence Detection (MFD)                   | 9  |
| 10 | I. Holliday Junction - sample                                    | 9  |
| 11 | J. Holliday Junction - sm-MFD                                    | 10 |
| 12 | K. Holliday Junction - Photon Distribution Analysis (PDA)        | 10 |
| 13 | L. HJ - filtered FCS                                             | 11 |
| 14 | M. HJ - FRET efficiency trajectories                             | 13 |
| 15 | References                                                       | 17 |

### A. Experimental assembly of the optofluidic antenna

Figure 1 **a** depicts the arrangement used for positioning the micropipette. Here, a 3-axis actuator (mini-Martock) is utilized for coarse alignment (micrometer precision) of the micropipette relative to the optical axis of the microscope objective. Moreover, the micropipette is mounted on a 3-axis piezo actuator (Physik Instrumente) mechanically coupled to the translations stage to control the distance between the micropipette and the cover glass with nanometer precision. Additionally, precision piezoelectric screws (Picomotor, New Focus) are implemented on the sample holder base plate for correcting the relative angle between the flat end of the micropipette and the cover glass.

A PolyTetraFluoroEthylene (PTFE) tube is connected to the non-tapered end of the micropipette. The other end of the PTFE tube is connected to a syringe (Setonic). Tuning the syringe plunger allows controlling the pressure inside the micropipette and, thus, the shape of the water meniscus.

Figure 1 **b** shows the micropipette when it is close to the cover glass. At this point, the micropipette is roughly aligned relative to the optical axis of the microscope objective. We image light scattered off the pipette end for visual guidance, facilitating positioning of the micropipette in the objective field of view. Figure 1 **c** exhibits an image of the cover glass and the micropipette where the scattering of laser light, sent through the microscope objective, is visible. Figure 1 **d** displays an image of the micropipette end viewed from the microscope objective. In this case, the micropipette was surrounded by air. Additionally, a simplified sketch of the experimental setup is shown in Fig. 1 **e**.

### B. Distribution of the excitation light in the antenna

We used the "Thin lens" package from "Lumerical Inc. V.8.20.1731" to solve the full vectorial model of Maxwell's equations inside the OFA dielectric structure. As an initial input we chose a Gaussian beam polarized along the  $x$ -axis. Moreover, a lens with a NA of 1.46 or 0.4 was used to simulate light focused to tight and large confocal spots, respectively, whereby the light source was set to fill the extension of the lens. In either case, the beam was mapped using 300 plane waves, and the wavelength was set to 532 nm. Furthermore, the distance of the lens from the focal plane was  $1.6\ \mu\text{m}$  in the case of a lens with  $\text{NA}=1.46$ , and  $8\ \mu\text{m}$  in the case of a lens with  $\text{NA}=0.4$ . For high precision determination of the confocal volume, a mesh grid with 5 nm resolution was applied in the region corresponding to the water layer.

First, we examine the scenario where the laser beam is tightly focused inside the water layer. Figures 2 **a** and **b** show the intensity distribution for the case of tight focusing in an antenna formed by a cover glass ( $n=1.517$ ),

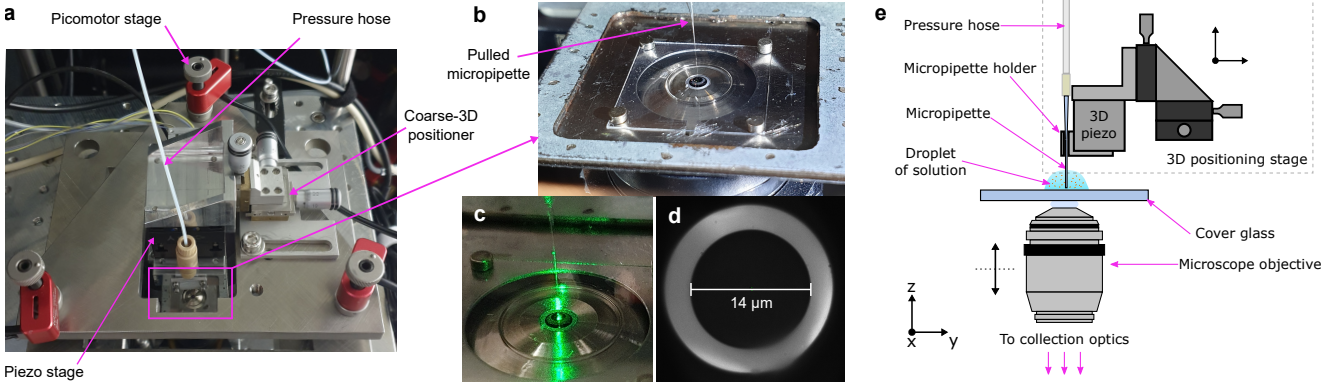

Figure 1. **Macroscopic system for assembling the optofluidic antenna.** **a**, Purpose-built sample holder for positioning the micropipette and aligning the micropipette end with respect to the cover glass. **b**, Micropipette aligned to the optical axis of the microscope objective and close to the cover glass. **c**, Zoom-in the micropipette-cover glass arrangement. Scattering of the laser used in wide-field illumination mode allows clearer visualization of the micropipette. **d**, Image of the micropipette end captured with the microscope objective. The micropipette is surrounded by air. **e**, Sketch of the experimental arrangement.

500 nm of water ( $n = 1.33$ ), and air ( $n = 1.0$ ). For this choice of water layer thickness, the electric field distribution produced by the excitation laser inside the OFA is only slightly modified as compared to the ideal Gaussian shape. Moreover, the volume confined up to  $I_0/e^2$  (width of a beam with maximum intensity  $I_0$ ) is only 5% smaller, and the intensity maximum is 3% higher compared to the case of the confocal volume at the glass/water interface. Figures 2 c and d show the case of a focused laser beam passing through a glass/water interface, i.e., in the absence of an OFA. The intensity distribution of the electric field is shown in c and d at the  $x/z$  ( $y = 0$  nm) and  $y/z$  ( $x = 0$  nm) planes, respectively. We note that the difference between the beam width at the  $x$ - $z$  and  $y$ - $z$  planes is due to the linear polarization of the input beam in combination with the high NA of the lens used to focus the light [1].

Next, we consider the case of a large confocal spot passing through the OFA. Figures 3 a and b show the intensity distribution obtained for focusing with a lens with  $NA=0.4$ . and antenna geometry consisting of a cover-glass ( $n = 1.517$ ), 500 nm of water ( $n = 1.33$ ), and air ( $n = 1.0$ ). In this scenario, the laser beam can be considered to a good approximation as a plane wave. Indeed, in the simulation we observe a modulation of the light along the  $z$ -axis produced by the interference of incident and reflected waves at the cover glass/water interface, as well as at the water/air interface. The visibility of the interference reaches 0.24 inside the water layer (see Fig. 3 c). Figures 3 d and e represent the intensity distribution obtained when the light passes through the water/air interface at the  $x/z$  ( $y = 0$  nm) and  $y/z$  ( $x = 0$  nm) planes, respectively. Finally, Fig. 3 f shows the intensity modulation along the  $z$ -direction when focusing the light at the glass/water interface. Here, we can see that in the absence of the water/air interface, the light intensity modulation occurs only in the glass substrate, and the intensity distribution in water is that of bulk solution. In the case of a large observation volume, the main effect of the water/air interface is to restrict the analytes' diffusion. Depending on the thickness of the water layer, the observation volume can be reduced by up to tenfold (for a 500 nm water channel thickness) relative to the case of diffusion in bulk solution. We note that the asymmetry in the  $x$ - $z$  and  $y$ - $z$  planes produced by the linear polarization of the input beam is no longer visible in the case of focusing with a low NA lens.

### C. Monte-Carlo simulations of the molecular diffusion

We employed Monte-Carlo simulations to investigate how the antenna geometry modifies the diffusion behavior of single molecules. We assume that the excitation power is low enough to prevent bleaching of the fluorophore. Figure 4 a shows a sketch of the structure used to simulate the antenna geometry. Here, we used experimental values for the dimensions of the micropipette. The shape of the water meniscus (water/air interface) was taken to follow an elliptical function with radii of  $7 \mu\text{m}$  in the  $x$  and  $y$  directions and a radius of  $0.5 \mu\text{m}$  in the  $z$  direction. To simulate the observation volume, we defined an elliptical region in the center of the OFA with lateral radius of  $0.5 \mu\text{m}$  and axial radius of  $2 \mu\text{m}$ . When an analyte comes within 10 nm of the simulated volume boundary, the

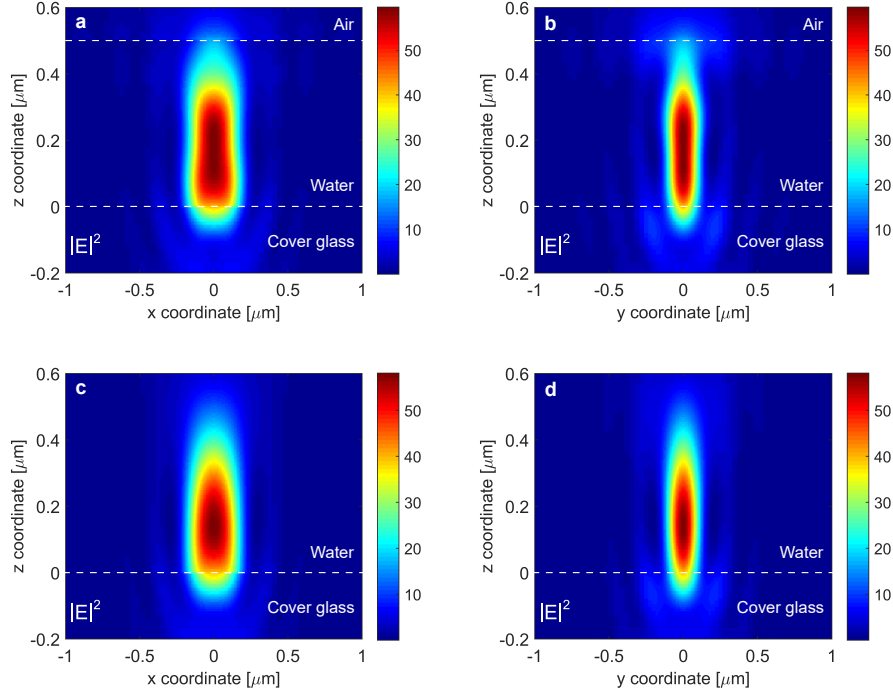

Figure 2. **Intensity profile of the excitation volume inside the OFA for NA=1.46.** Intensity distribution of the confocal spot inside the optofluidic antenna at the  $x/z$  ( $y = 0$  nm) plane (a) and at the  $y/z$  ( $x = 0$  nm) plane (b). The dashed white lines indicates the interfaces of the materials constituting the OFA. Intensity distribution of the confocal spot passing through the glass/water interface at the  $x/z$  ( $y = 0$  nm) plane (c) and at the  $y/z$  ( $x = 0$  nm) plane (d). The horizontal dashed white line indicates the cover glass/water interface.

simulation implements a reflection in a random direction. A burst is created every time the analyte enters and exits the observation volume. We used the function '*normrnd()*' from **Matlab** to generate random vectors with three spatial coordinates for simulating the trajectories. We used a time step of 80 ns and a diffusion coefficient of  $D = 400 \mu\text{m}^2/\text{s}$  for the simulations with and without the OFA. Moreover, we considered  $N = 10^7$  steps of diffusion which is equal to 0.8 s of diffusion, and included an average of  $10^4$  trajectories in each simulation. Figure 4b corresponds to the simulation in open solution where no boundaries are imposed.

The results of the simulations reveal a larger number of bursts per unit time with the OFA compared to the case of diffusion in an open solution. Figure 4c shows exemplary time traces obtained with the OFA (red trace) and in an open solution (blue trace). Here, each trace has been normalized to the maximum number of photons collected per burst. The difference in the number and amplitude of bursts in the two scenarios is evident. Furthermore, the dependence of the enhancement in the number of bursts obtained with the OFA as a function of the thickness of the water channel is shown in Figure 4d. Here we can see that as the water channel increases, the number of bursts approaches the case of diffusion in open solution.

To obtain insight into the experimental observation that the water/air interface slows down diffusion, we implemented a potential  $\sigma(z)$  to slow down the motion of analytes at this interface (See Fig. 4e). The strength of the potential is tuned by the time  $t_\sigma$  that the molecule stays in the region delimited by  $d_\sigma$ . Figure 4f shows the correlation analysis from the simulated trajectories for three different values of  $t_\sigma$  over an extension of the potential in the  $z$ -direction given by  $d_\sigma = 10$  nm. We find that in the case of the dye molecule Rhodamine-110, a value of  $t_\sigma = 40 \mu\text{s}$  can qualitatively reproduce the experimental observations.

We found that the details of the mathematical expression for the potential are not critical. For example, a step-wise function that freezes the motion of the analytes completely or a smooth function such as exponential decay of the analytes' diffusion coefficient conduce to similar results as long as the confinement time is fixed. We emphasize that the idea of the simulations is not to explain the physical mechanism behind the slow-down motion of the analytes but to provide a consistent explanation for the interface processes, which need further research to reach a quantitative understanding.

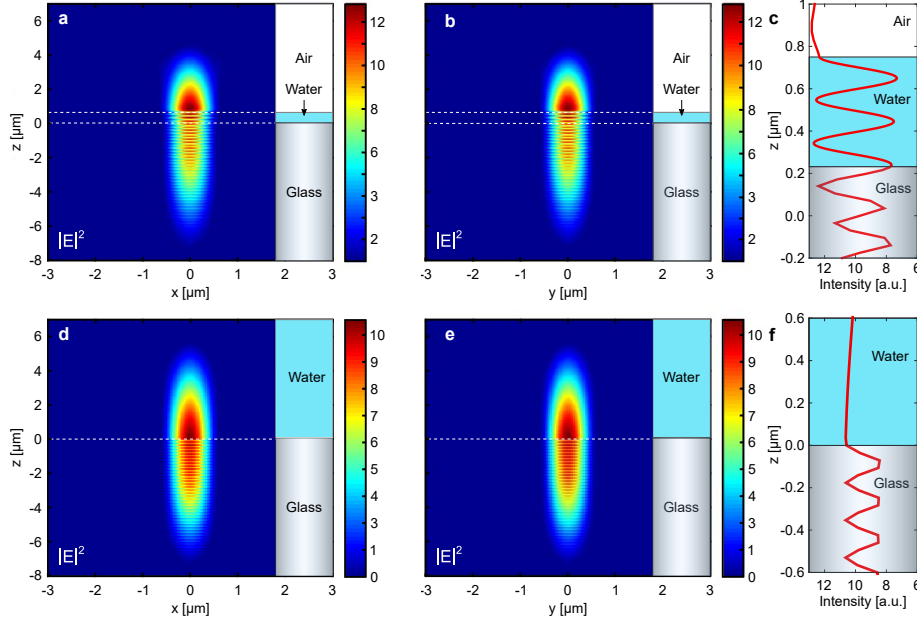

Figure 3. **Intensity profile of the excitation volume inside the OFA for NA=0.4.** Intensity distribution of the confocal spot inside the optofluidic antenna at the  $x/z$  ( $y = 0$  nm) plane (a) and at the  $y/z$  ( $x = 0$  nm) plane (b). The dashed white lines indicates the interfaces of the materials constituting the optofluidic antenna. c, Intensity distribution of the confocal spot inside the OFA along the  $z$ -direction for  $x = y = 0$ . Intensity distribution of the confocal spot at the glass/water interface. Figures c and d corresponds to the planes  $x/z$  ( $y = 0$  nm) and  $y/z$  ( $x = 0$  nm), respectively. The dashed white line indicates the glass/water interface. f, Intensity distribution of the confocal spot at the glass/water interface along the  $z$ -direction for  $x = y = 0$ .

#### D. Calculation of the molecular detection efficiency (MDE)

Detected fluorescence counts in a confocal microscope are characterized by the focus of the excitation beam, the point-spread function (PSF) at the image plane and the transmission function of the pinhole in the detection path [2]. The excitation can be approximated as a Gaussian beam with intensity distribution

$$I(r, z) = \frac{w_0^2 I_0}{w^2(z)} \cdot e^{-\frac{2r^2}{w^2(z)}} \quad (1)$$

$$w^2(z) = w_0^2 + \left( \frac{\lambda}{n\pi w_0} \right)^2 z^2$$

where  $I_0$  is a normalization constant. In the simulations, we set the lateral dimension of the beam waist  $w_0$  to  $1000 \mu\text{m}$ , the excitation wavelength to  $\lambda_{exc} = 532 \text{ nm}$  and the refractive index of the medium to  $n=1.33$  in order to mimic the experimental conditions. While the PSF is often approximated as that of a point-like source in a homogeneous medium, in the case of OFA one should account for the vectorial nature of radiation from a dipole in the stratified medium. We calculate the PSF for horizontally and vertically oriented dipoles using a semi-analytical approach presented by Mortensen et al. [3] for different thicknesses of the water layer ranging from  $0.1 \mu\text{m}$  to  $5 \mu\text{m}$ , a numerical aperture  $\text{NA}=1.46$  and an emission wavelength  $\lambda_{em}=550 \text{ nm}$ . Figure 5a displays an example of the lateral cross-sections in a  $1 \mu\text{m}$  water layer.

The effect of the pinhole is to limit the transmission of the signal in the image plane since the fraction of light that passes depends on the position of the image with respect to it. Thus, we define the molecular detection efficiency (MDE) as

$$\text{MDE}(r, z) = I(r, z) \cdot \int \text{PSF}(r, r', z) \cdot T(r') \quad (2)$$



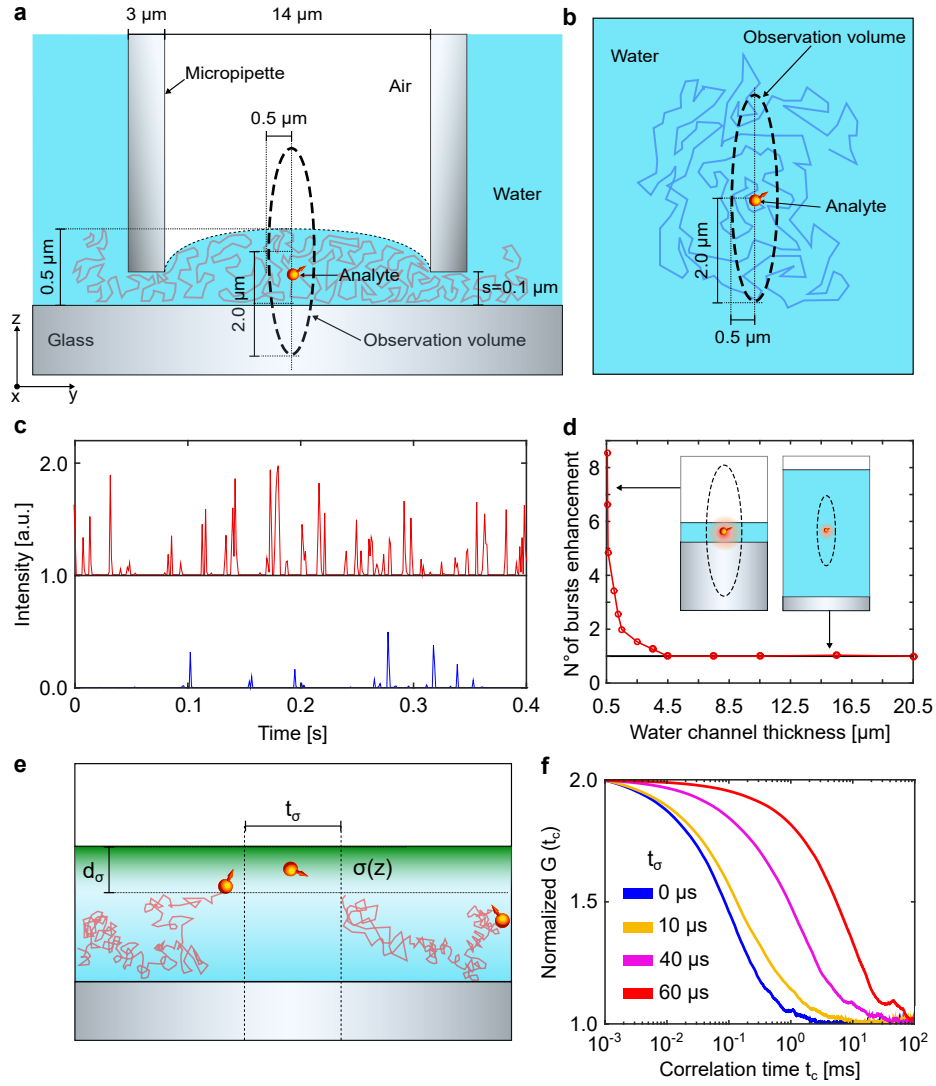

Figure 4. **Diffusion inside the OFA: Monte-Carlo simulation.** Sketch of the simulation where a single analyte diffuses inside the OFA (a) and in bulk solution (b). The red and blue trajectories illustrate a possible path of the analytes inside the OFA and in bulk, respectively. c, Exemplary time traces simulated inside the OFA (red trace) and in bulk solution (blue trace). d, Enhancement in the number of bursts obtained with the OFA relative to the case of diffusion in an open solution. The enhancement in the number of bursts is shown for different thicknesses of the water channel. Insert: illustration of two extreme thicknesses of the water layer. e, Sketch of the simulation where a potential  $\sigma(z)$  (green region) is defined at the water/air interface. The potential extends along the complete interface in the x-y-directions. Moreover, the extension of the potential in the z-direction is given by  $d_\sigma = 10$  nm. The strength of the potential is modulated by the time  $t_\sigma$  that the molecules spend in the region defined by  $d_\sigma$ . f, Correlation analysis of the simulated time traces for different values of  $t_\sigma$  and a fix value of  $d_\sigma = 10$  nm.

118 whereby  $T(r)$  is given by

$$T(r) = \begin{cases} 1 & r < 0.5\mu m \\ 0 & r > 0.5\mu m \end{cases} \quad (3)$$

119 is the transmission function of the pinhole. The quantity MDE can be computed for horizontal and vertical dipole  
 120 orientations ( $H, V$ ), respectively. Figure 5b shows the axial profile along  $r=0$  together with the excitation profile.

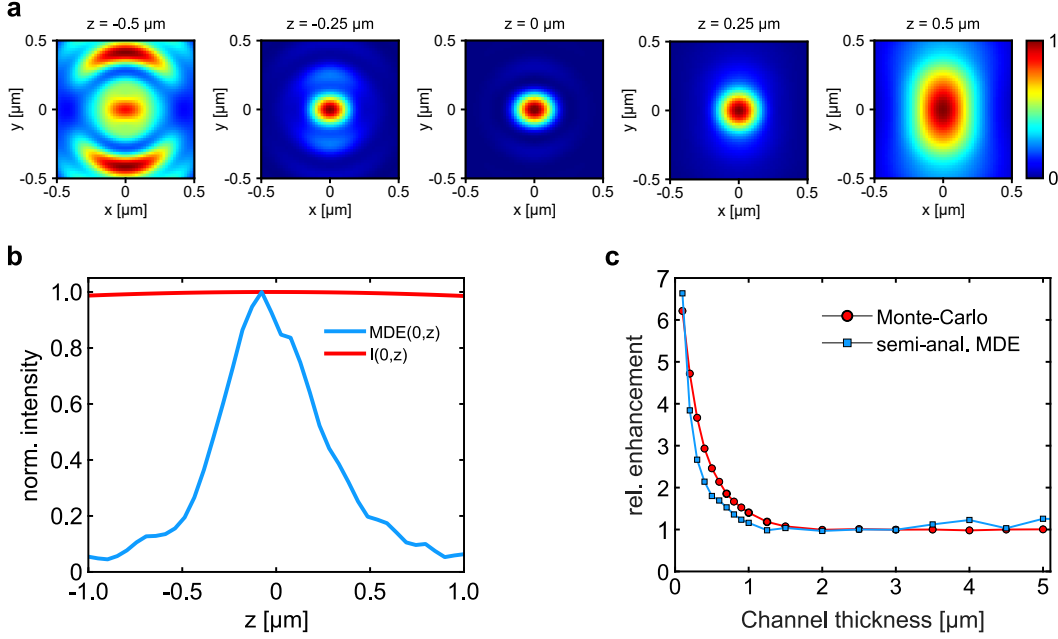

Figure 5. **Relative enhancement of photon collection in the OFA.** **a.** Cross-section of the PSF of a horizontally-oriented (x-axis) dipole inside a  $1 \mu\text{m}$  water layer bounded by cover-glass ( $n=1.5$ ) and air ( $n=1$ ). **b.** Molecular detection efficiency of the OFA (blue) and the excitation profile (red). **c.** Relative enhancement of the position-averaged MDE for small water layer thicknesses. The blue line represents a semi-analytical calculation based on vectorial diffraction, and the red line is a Monte-Carlo simulation of a diffusing molecule inside water layers with varying thickness for the same parameters of the observation volume.

121 The orientation-averaged MDE is then given by

$$\text{MDE}(r, z) = \frac{2}{3}\text{MDE}_H + \frac{1}{3}\text{MDE}_V \quad (4)$$

122 The relative enhancement of the position-averaged MDE inside the OFA compared to an open solution is shown  
 123 in Fig. 5c and compared with a Monte-Carlo simulation of diffusion through the observation volume. For the  
 124 Monte-Carlo simulations the PSF of the emitter is approximated by a spherical wavefront.

#### 125 E. Photon collection enhancement at the water/air interface

126 Here, we show that a simple water-air interface also enhances the photon collection efficiency as compared to  
 127 the case of conventional open solution. Again, several effects can contribute.

128 Figure 6 **a** shows a cross-section of the averaged power emission distribution calculated for a dipole-like emitter in  
 129 open solution. Here, we have assumed a fast randomly changing dipole orientation such that the obtained emission  
 130 pattern is symmetric along the azimuth ( $\phi$ ). Subwavelength vicinity of the interface can substantially modify the  
 131 radiation pattern and thus direct the emission towards the collection optics. Figures 6 **b** and 6 **c** show cross-sections  
 132 of the emission patterns obtained from an emitter positioned at 1 nm, and 100 nm from the water/air interface,  
 133 respectively. For comparison, we also include the emission pattern of an emitter inside the OFA in Fig. 6 **d**, where  
 134 the water layer thickness is set to 500 nm, and the emitter position is 250 nm from the water/air interface. Figure 6 **e**  
 135 shows the photon emission distribution obtained for the different cases shown from **a** to **d**. Here, the area under  
 136 the curves has been normalized to one for a better visual comparison. Additionally, we have included the photon  
 137 emission distribution of an emitter located at 1000 nm from the water air interface (gray curve). Figure 6 **f** shows  
 138 the total photon collection (labeled with the same color code as in (e)). A simple water-air interface can efficiently  
 139 channel more than 75% of the total radiated power into angles covered by a collection optics with  $\text{NA}=1.46$ . This  
 140 corresponds to about 85% higher photon collection as compared to the case of an emitter in open solution. This

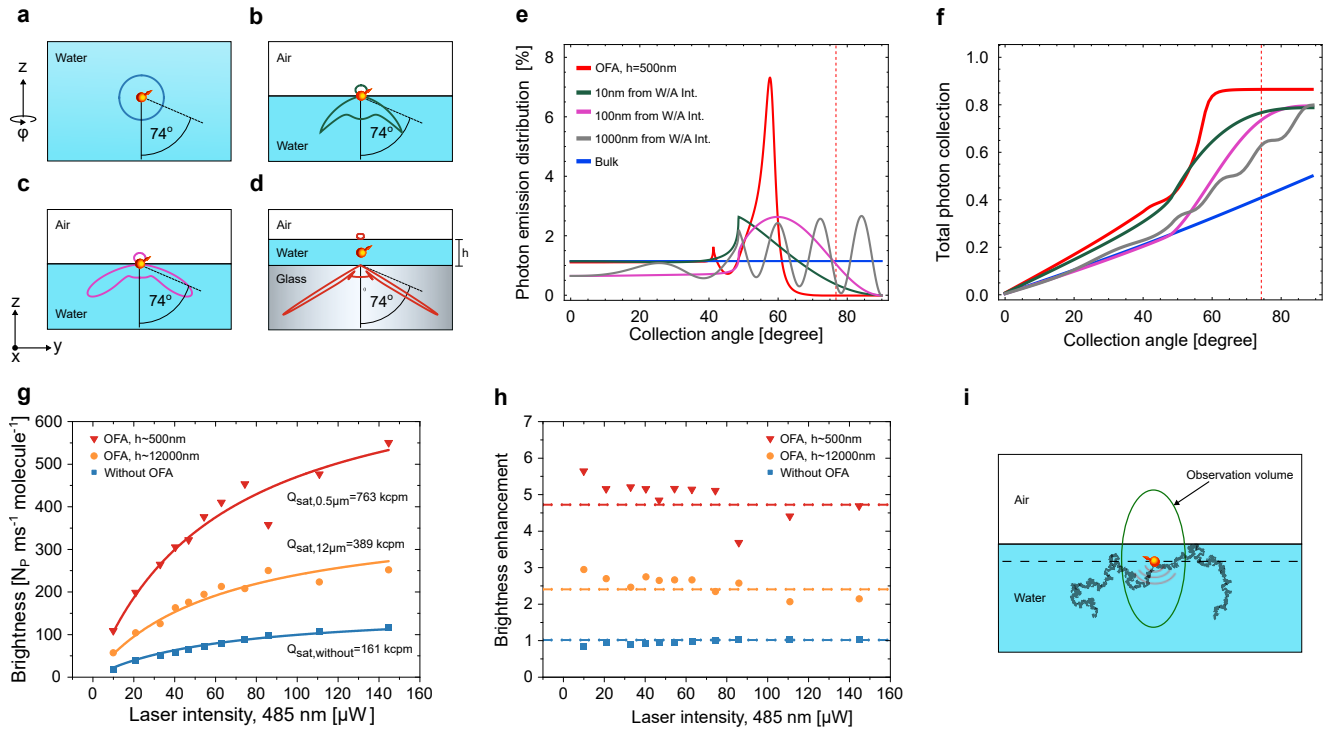

**Figure 6. Orientation averaged emitter in different dielectric structures.** Averaged radiation pattern of an emitter with rapidly changing orientation in open solution (a), at 1 nm from the water/air interface (b), at 100 nm from the water/air interface (c), and in the center of an OFA (d), with  $h=500$  nm. e, Calculated photon emission distribution of the different scenarios shown from a to d, and for the case of an emitter at 1000 nm from the water/air interface. Here, the area under the curve has been normalized to one for a clearer visual comparison. The red vertical dotted line indicates the maximum collection angle of a lens with 1.46 NA. f, Calculated photon collection efficiency obtained in each scenario described in e. The red vertical dotted line indicates again the maximum collection angle of a lens with 1.46 NA. g, Power dependent brightness saturation obtained in confocal measurements of freely diffusing Rhodamin110 molecules obtained via FCS (see main text for details). The blue and red curves correspond to the case of analytes diffusing in an open solution and inside the OFA, respectively. The orange curve corresponds to the case of an OFA with  $h=12 \mu\text{m}$ , where the center of the observation volume coincides with the water/air interface. h, Experimental brightness enhancement obtained for Rhodamine-110 dye molecules diffusing in open solution (blue data points), inside an OFA with  $h=500$  nm (red data points), and inside an OFA with  $h=12000$  nm (orange data points). The horizontal dashed lines indicate the average brightness enhancement in each case. In the case of an OFA with  $h=12000$  nm, the focal plane of the lens used for collection is set just below the water/air interface to simulate a scenario where an emitter is in the close vicinity of a water/air interface (figures b and c). i, Sketch of a confocal-based measurement at the water/air interface. The black dashed horizontal line indicates the focal plane.

enhancement can be exploited as long as the emitter is located close to the water/air interface. Furthermore, the collection of light radiated by an emitter close to the air /water interface can be further enhanced due to refraction at the glass/ water interface.

Figure 6g shows the brightness per molecule as a function of the excitation power obtained experimentally for different experimental arrangements (curves red and blue are also shown in the main text). In Fig. 6h, we show a comparison of the experimentally obtained brightness enhancement as a function of the excitation power for the case of Rhodamine-110 molecules diffusing in an open solution (blue data points), inside an OFA with  $h=500$  nm (red symbols), and inside an OFA with  $h=12 \mu\text{m}$  (orange data points). A 2.4-fold enhancement of brightness is evident in the latter case. As shown in Fig. 6i, the focal plane was set slightly below the water/air interface. In this case, the MDE is also enhanced since the observation volume is more confined as compared to the case of an open solution (see discussion in the main text around Fig. 2a).

The arrangement illustrated in Fig. 6i is readily available to any conventional FCS-type measurement setup and offers a valuable means for achieving some of the advantages of a proper OFA. A quantitative study of this case is beyond the scope of our current work and is left for future studies.

## F. Fluorescence correlation spectroscopy

Fluorescence correlation analysis was performed in different scenarios. In the case of free dye molecules (i.e., not attached to a biomolecule), the fluorescence signal corresponded to 2-4 molecules in the observation volume. At the single-molecule (sm) level, between 2-5 bursts per second were registered, yielding an observation volume occupation ratio of roughly 1:1000. Moreover, to resolve dynamic events, the signal was filtered using lifetime information (see [4]). Fits of the correlation curves for the free dye series were done using a correlation function including the triplet state of the dye and its translational diffusion in a 3-dimensional Gaussian-shaped volume as follows [5],

$$G(t_c) = b_0 + \frac{1}{N_{\text{bright}}} \left[ 1 + \frac{t_c}{t_d} \right]^{-1} \left[ 1 + \frac{t_c}{t_d \left( \frac{z_0}{w_0} \right)^2} \right]^{-1/2} \left[ 1 - |A| + |A| e^{-t_c/t_A} \right]. \quad (5)$$

Here,  $b_0$  denotes the offset,  $N_{\text{bright}}$  is the number of bright particles in the focus,  $t_d$  represents the diffusion time,  $A$  signifies the amplitude for the triplet state, and  $t_A$  is the time constant of the triplet state. For the free dye series, the brightness of a molecule was estimated using the number of molecules in the bright state as,

$$N_{\text{bright}} = N \cdot (1 - A), \quad (6)$$

and therefore the brightness  $Q$  of a molecule is given by

$$Q = \frac{F_{D|D}}{N} = \frac{F_{D|D}}{N_{\text{bright}}} \cdot (1 - A), \quad (7)$$

whereby  $F_{D|D}$  signifies the background-corrected fluorescence of the donor after excitation. Since increasing the excitation intensity leads to saturation, we fitted the brightness as a function of the excitation intensity using a saturation curve given by (see Fig. 2b in the main text) [6],

$$Q(I_{\text{exc}}) = Q_{\text{sat}} \frac{I_0/I_\sigma}{1 + I_0/I_\sigma}, \quad (8)$$

where  $I_\sigma$  corresponds to the cross-section excitation power and is fitted globally.  $Q_{\text{sat}}$  is the saturated brightness of a molecule at the maximum  $I_{\text{exc}}$ .

We note in passing that when using the OFA, high values of  $z_0/w_0$  were fitted, with an average value of approximately 13. This figure suggests a 2D diffusion behavior of the observed particles, whereas a measured value for  $z_0/w_0$  of approximately 4 was found for particles in an open solution, which reports a normal 3D diffusion.

## G. Diffusion of differently charged dye molecules inside the OFA

The nature of the interaction between analytes and the water/air interface remains unknown. To gain more experimental insight into this issue, we examined the diffusion of Rhodamine-19 (positively charged), Rhodamine-123 (positively charged), and Alexa-488 (negatively charged). For this experiment, the antenna geometry was fixed to a water layer thickness of  $0.5 \mu\text{m}$ . Depending on the specific dye, the excitation wavelength was chosen to be 488 nm (Toptica iBEAM SMART 488) or 532 nm (COHERENT-Sapphire 532-200). In both cases, the excitation power was set to  $10 \mu\text{W}$  to avoid photodamage. Figure 7 shows the normalized autocorrelation corresponding to the different dyes mentioned above with (red) and without (blue) OFA. Here, positively-charged molecules Rhodamine-19 and Rhodamine-123 show an increase in the diffusion time by a factor of 110 and 31, respectively, whereas negatively charged dye molecules Rhodamine-110 (see Fig. 2b in the main text) and Alexa-488 exhibit a considerably smaller enhancement of 7.5 fold and 17 fold in the diffusion time, respectively. We remark that in this experiment, the lateral extension of the observation volume has been reduced to  $w_0 = 400 \text{ nm}$  to confirm that the enhanced diffusion time is not an artifact produced by the size of the observation volume.

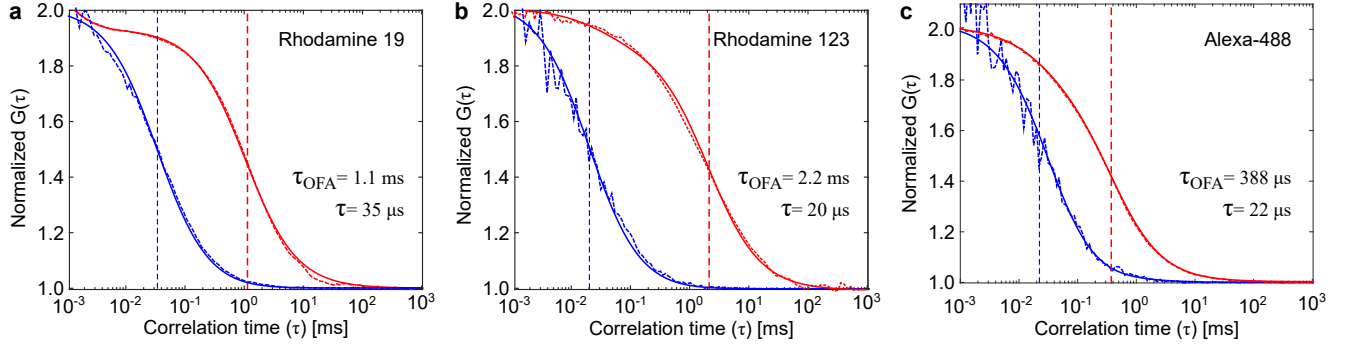

Figure 7. **Charge-dependent diffusion enhancement.** Normalized cross-correlation (dotted red, blue curves) and corresponding fit (continuous red, blue curves) obtained for free dye molecules in the optofluidic antenna (red curves) and in bulk solution (blue curves). The diffusion time in an open solution ( $\tau$ ) and inside the OFA ( $\tau_{\text{OFA}}$ ) extracted from the fits are shown in the legend and also indicated with vertically dotted blue ( $\tau$ ) and red ( $\tau_{\text{OFA}}$ ) lines. All measurements were performed at picomolar concentration and with 10  $\mu\text{W}$  excitation power using a 532 nm (a) or 488 nm (b, c) laser.

## H. Multiparameter Fluorescence Detection (MFD)

Single-molecule Multiparameter Fluorescence Detection (sm-MFD) experiments were performed on a home-built setup based on an Olympus IX70 inverted microscope as described in Ref. [7]. For excitation and collection of the fluorescence signal, we used an Olympus 100x/1.4NA objective. For excitation in the PIE configuration green ( $\lambda_{\text{exc}} = 485 \text{ nm}$ ) and red ( $\lambda_{\text{exc}} = 640 \text{ nm}$ ) linearly polarized pulsed diode lasers were used (LDH-D-C 485, PicoQuant and LDH-D-C 640, PicoQuant). Both lasers were operated at a repetition rate of 32 MHz [8, 9]. The fluorescence signal was filtered from the excitation light using a triple band beamsplitter 488/570/640 (AHF Analysentechnik). A polarizing beam splitter in the detection path splits the beam into perpendicular and parallel polarizations. Furthermore, the signal from the donor and acceptor molecules in each polarization channel was separated with a dichroic beamsplitter. A further step of filtering using bandpass filters in the donor (ET535/50, AHF Analysentechnik) and acceptor (HQ 730/140, AHF Analysentechnik) channels was taken to minimize the spectral overlap. Finally, each beam was directed to avalanche photodiodes (APD) for detection. Single-photon counting was done with synchronized channels (HydraHarp 400, PicoQuant, Germany) operating in Time-Tagged Time-Resolved (TTTR) mode. Data analysis was performed using in-house software available upon request on the website of the Seidel group (<https://www.mpc.hhu.de/software.html>). An emCCD camera (DV887 ECS-BV, Andor) was used to position the center of the micropipette above the focus of the laser beam while it was illuminated with a flashlight. The objective was mounted on a closed-loop piezo to ensure high precision and stability of the observation volume (PI, E-662).

## I. Holliday Junction - sample

A label scheme was chosen to allow resolving the two stacked conformations (HF: high FRET and MF: middle FRET) and the potentially planar conformations (LF: low FRET) of the Holliday Junction (HJ). For the computation of the expected FRET efficiencies, we used in-house software based on FRET positioning screening [10]. The measured distances from Photon Distribution Analysis (PDA) for the HF and MF states were slightly higher than expected (see Table I). For the calculation a Förster Radius of  $R_0 = 49.3 \text{ \AA}$  was used. The observed shift of around  $6 \text{ \AA}$  towards higher distances implies a distance of around  $60 \text{ \AA}$  for the LF planar state of the HJ, leading to roughly  $E = 0.2$ . The labeling quality was monitored using stoichiometry and anisotropy. As one can see in Fig. 8a, most of the molecules were doubly labeled, and only minor fractions of donor- and acceptor-only molecules appeared. The anisotropy decay was fitted using a two-component Perrin equation [11],

$$r_D(\tau_{D(A)}) = r_0 \left[ \frac{X}{1 + \frac{\tau_{D(A)}}{\rho_1}} - \frac{1-X}{1 + \frac{\tau_{D(A)}}{\rho_2}} \right], \quad (9)$$

where the quantities  $\rho_1$  and  $\rho_2$  denote the characteristic rotational time of the dye and the HJ, respectively, and  $X$  corresponds to the fraction of the species rotating with a characteristic rotational time  $\rho_1$ . As expected, the anisotropy decay is mostly described by the rotation of the dye ( $X=0.87$ ).

| FRET level (state) | predicted $\langle R_{DA} \rangle [\text{\AA}]$ | $\langle R_{DA} \rangle [\text{\AA}]$ with OFA | $\langle R_{DA} \rangle [\text{\AA}]$ without OFA |
|--------------------|-------------------------------------------------|------------------------------------------------|---------------------------------------------------|
| HF (stacked HJ)    | 36                                              | 38.4                                           | 39                                                |
| MF (stacked HJ)    | 46                                              | 51.5                                           | 52.7                                              |
| LF (planar HJ)     | 54                                              | expected: $\approx 60$                         | expected: $\approx 60$                            |

Table I. Comparison of the calculated distances using FPS to the in PDA measured distances for the measurement with 1 mM  $\text{Mg}^{2+}$ .

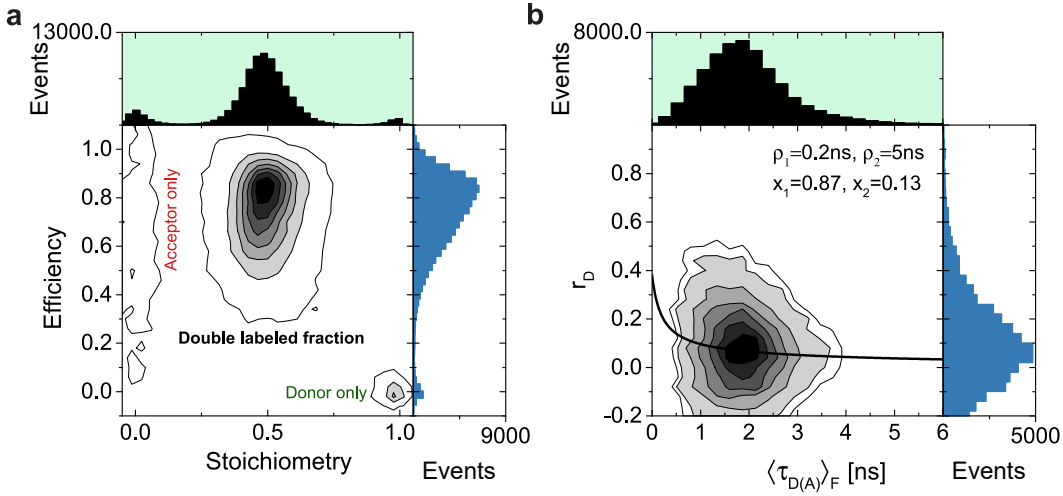

Figure 8. **Monitoring the hybridization and labeling quality of the HJ.** **a**, MFD-histogram of stoichiometry and FRET efficiency shows three populations, two minor (acceptor only and donor only) and one major (doubly labeled) populations of HJ. **b**, Lifetime anisotropy diagram with an overlapped two-component Perrin equation (solid black line). Here, one main population of the doubly labeled HJ is obtained.

## J. Holliday Junction - sm-MFD

Figures 9a and 9b show the comparison of the HJ dynamics in an open liquid (purple) and inside the optofluidic antenna (yellow) for a buffer solution without the addition of  $\text{Mg}^{2+}$  (a) and for a buffer solution at 1 mM  $\text{Mg}^{2+}$  concentration (b). We observe no change in the dynamics of HJ for diffusion inside the OFA compared to the case of the open solution.

## K. Holliday Junction - Photon Distribution Analysis (PDA)

In order to test the effect of the prolonged diffusion time  $\tau_d$  on the PDA, simulations similar to those in Ref. [12] were performed. We generated data for a two-state system with FRET efficiencies equal to the ones measured and listed in Table I. We note that in contrast to the real data, we assumed that all molecules show dynamical averaging in the simulations. Figure 10 shows the resulting distribution of burst duration with and without the OFA for the experimental data (a) and for the simulated data (b). The simulation can reproduce the distributions for the measurements qualitatively with and without the OFA. We note that in the simulations, the diffusion time without the OFA is set to  $\tau_d = 0.7\text{ms}$  and  $\tau_d = 2\text{ms}$  in the case of the OFA. Figure 10c shows the fraction of molecules with conformational dynamics as a function of the diffusion time. The percentage of active molecules



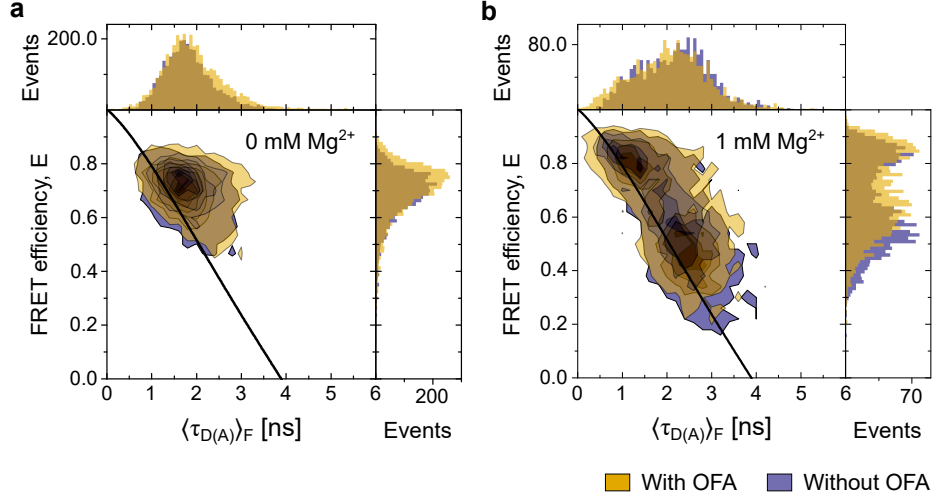

Figure 9. **Holliday junction single molecule multiparameter fluorescence detection (sm-MFD): Comparison between measurements with and without using the OFA.** **a**, Two dimensional histogram of the donor fluorescence lifetime in presence of an acceptor  $\langle \tau_{D(A)} \rangle_F$  and the FRET efficiency  $E$ . The black line (static FRET line) describes the relation of intensity and donor lifetime based equal FRET efficiencies and bursts from molecules with a single conformational state are distributed on this line. The molecules show a fast dynamic between their conformational states and therefore a high averaging of the FRET efficiency resulting in only one visible population. The plot in purple corresponds to the case of an open solution without OFA. **b**, Adding 1 mM  $Mg^{2+}$  slows down the dynamical behavior and two populations. This effect become visible in both cases.

detected with PDA is lower for short diffusion times than for longer detection times in a global analysis of time windows (TWs) with widths of 1, 2 and 3 ms. Moreover, the simulation results show that a factor of 3 in the diffusion time results in a 10 % improvement in detecting dynamic molecules. Furthermore, in the case of molecules with different brightnesses, a difference in the number of dynamic molecules is noticeable for short diffusion times (see Fig. 10d). The simulated PDA without and with OFA is shown in Fig. 10e and f. Here, it is evident that molecules with longer diffusion time exhibit a higher fraction of dynamic molecules relative to the stable FRET states. Thus, the simulations indicate that the enhanced detection of dynamic molecules is mainly due to the longer observation times, which can explain the observations made in Fig. 3 of the main manuscript.

#### L. HJ - filtered FCS

Another approach to resolving fast dynamics between conformations is filtered Fluorescence Correlation Spectroscopy (fFCS) based on Ref. [4]. Here, FRET species are separated using a lifetime-based filter. Selecting the HF and MF species of the HJ via burst selection leads to a distribution of short lifetimes for the HF state and longer lifetimes for the MF state. Moreover, applying these filters to the correlation analysis of all selected FRET bursts (a mixture of MF and HF) leads to a correlation curve between the FRET states. Furthermore, the correlation analysis provides information about the relaxation time between the HF and MF states in the form of an anti-correlation term.

To analyze the experimental data, we consider a global-fit approach using species-auto-correlation (SAC) and species-cross-correlation (SCC) curves. The fit of the SAC was done using equation 5 and for the fitting of the SCC we used the following equation,

$$G(t_c) = G(t_c) = b_0 + \frac{1}{N_{bright}} \left[ 1 + \frac{t_c}{t_d} \right]^{-1} \left[ 1 + \frac{t_c}{t_d \left( \frac{z_0}{\omega_0} \right)^2} \right]^{-1/2} \left[ 1 - |A| + |A| \cdot e^{-t_c/t_A} \right] \times \quad (10)$$

$$\left[ 1 - |AB| \cdot \left( |B|e^{-t_c/t_B} + |C|e^{-t_c/t_C} + (1 - |B| - |C|) \cdot e^{-t_c/t_D} \right) \right], \quad (11)$$

where  $AB$  corresponds to the total amplitude of all anti-correlation terms, and  $B$ ,  $C$ , and  $(1 - B - C)$  are the

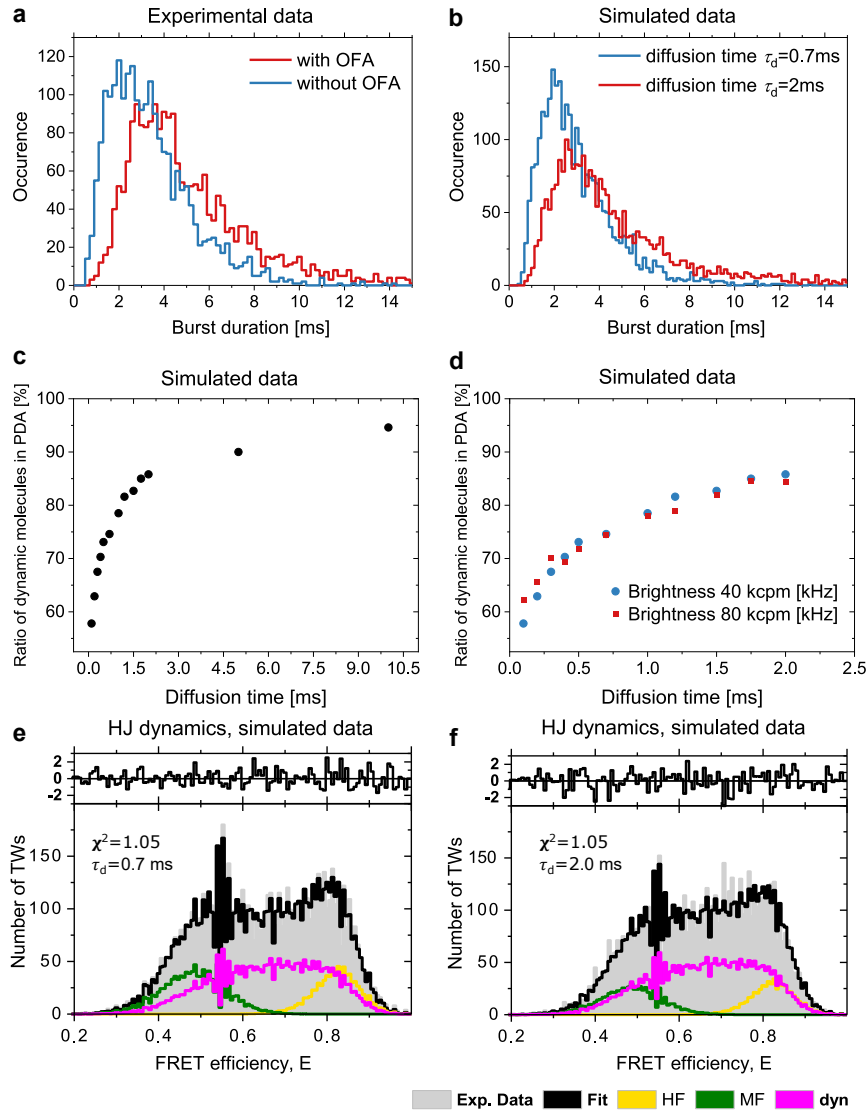

Figure 10. **Simulation of a PDA analysis using a two-state system with different diffusion times.** **a**, Burst duration distribution obtained from the experimental data for the measurement with and without OFA. **b**, Simulated distribution using a diffusion time of 0.7 ms for the case without OFA and 2 ms for measuring with OFA. **c**, Fraction of dynamic molecules found in the PDA analysis from a simulation using only dynamic molecules as a function of the diffusion time. **d**, Same as **c** but with molecules having different brightness. PDA analysis of the simulated two-state system at fast (**e**) and long (**f**) diffusion times. The distribution of the static HF state is shown in yellow, the distribution of the static MF state is shown in dark green, and the dynamic distribution is shown in magenta. The analysis was done using a global fit with TWs of 1, 2 and 3 ms.

individual amplitudes of the different species. Analysis of the SAC shows that the diffusion time  $\tau_d$  is almost three times higher using the OFA (see Fig. 11a). On the other hand, the average dynamic relaxation time  $t_{av,dyn} \approx 100\mu s$  show no significant change when measuring the HJ inside the OFA compared to an extended solution (see Fig. 11b,c). The combination of the MFD and fFCS analysis ultimately demonstrates that the use of the OFA affects neither the conformational states of the HJ nor the internal dynamic exchange rate between them.

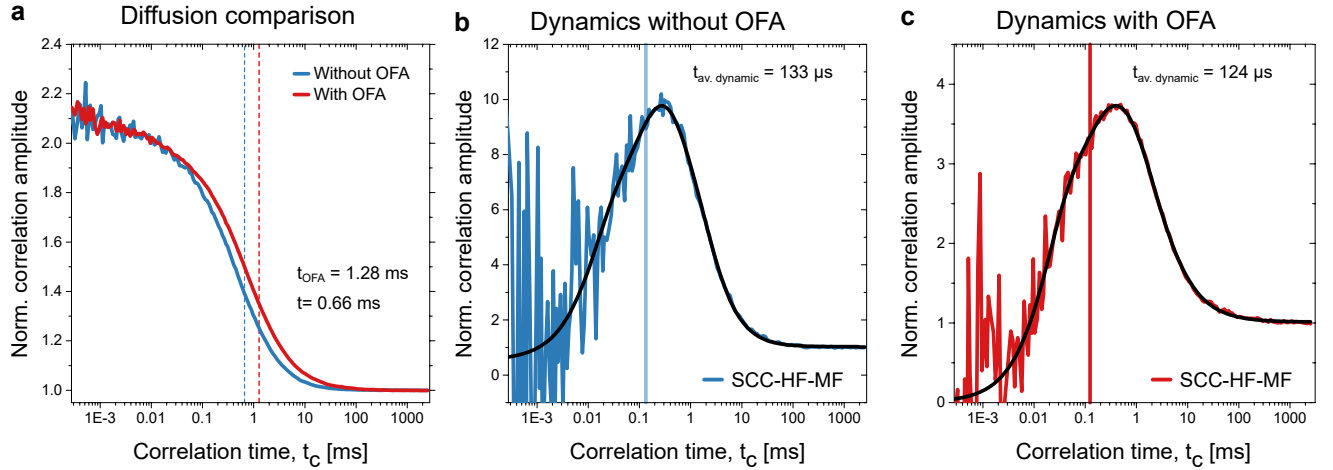

Figure 11. **HJ dynamics analysis using species-filtered Fluorescence Correlation Spectroscopy.** **a**, Lifetime filtered, medium FRET (MF) species auto-correlation function of the Holliday junction D(a)A(b) without  $\text{Mg}^{2+}$  with (red curve) and without (blue curve) the OFA. The vertical blue and red dashed lines indicates the diffusion time obtained from the corresponding fit, also shown numerically as inset. Figures **b** and **c** correspond to the High FRET (HF) and medium FRET (MF) species cross correlation of the HJ without (blue curve) and with (red curve) antenna. The vertical blue and red lines indicate the average relaxation time also show as inset.

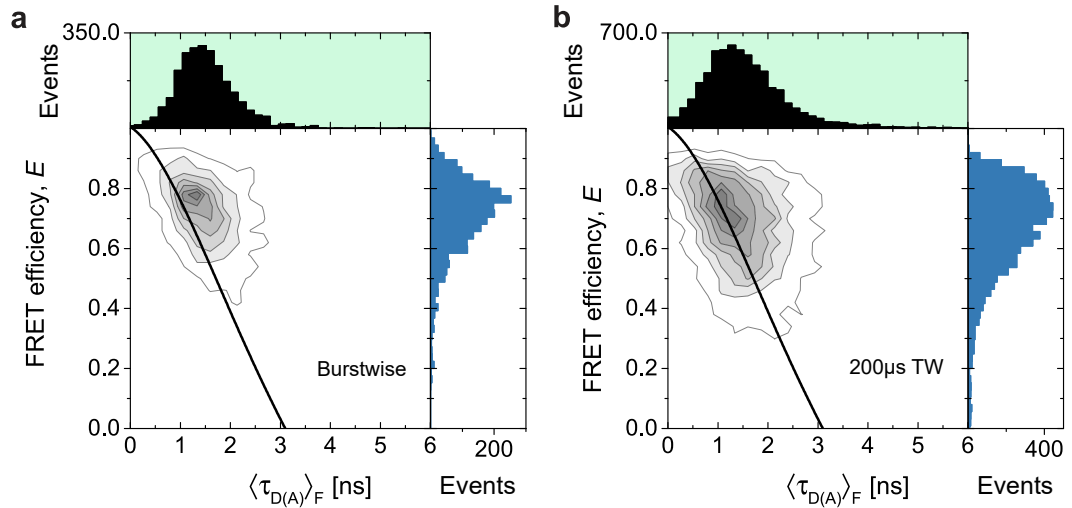

Figure 12. **Comparison of burstwise and time-window based analysis of the HJ in MFD.** **a**, Burstwise analysis of the sm-MFD measurement of the HJ labeled with Alexa488/Atto647N for a buffer without addition of  $\text{Mg}^{2+}$ . 2-D histogram of the lifetime of the donor in presence of an acceptor  $\langle \tau_{D(A)} \rangle_F$  and the FRET efficiency  $E$ . The static FRET line was estimated using  $E(\langle \tau_{D(A)} \rangle_F) = 1 - ((0.0126\langle \tau_{D(A)} \rangle_F^4 - 0.148\langle \tau_{D(A)} \rangle_F^3 + 0.5521\langle \tau_{D(A)} \rangle_F^2 + 0.3416\langle \tau_{D(A)} \rangle_F - 0.0174)/3.1)$ . The FRET population is clearly shifted off the static FRET line towards a longer lifetime. **b**, TW analysis of the same bursts selected in the burstwise approach (see **a**). Here, every burst is cut into equally 200  $\mu$ s long TW. The 1D projections show a broadening of the distribution and the TW-bursts no longer are shifted away from the static FRET line. The excitation power used in the experiment is  $I_{\text{exc},485} = 800$   $\mu$ W.

237

### M. HJ - FRET efficiency trajectories

238

239

240

The aim of the measurements using the OFA is to resolve the FRET levels of the molecule on a time scale where the states of the HJ are stable. In this regime, dynamical averaging can be avoided. Thus, we can follow the switching between the FRET levels and, therefore, the transition of the HJ to another state in “real time”.

However, the poor photon detection of standard optical configurations often implies long integration times when using MFD. For example, in burstwise-based analysis, the signal is integrated over the whole burst duration. Thus, when the exchange rate between the molecule’s conformations is faster than the diffusion time, the analysis averages out the FRET efficiency levels into one population. An approach that is not limited to the burst duration is PDA, which is based on equally-sized time windows with a global analysis over different TWs, typically 1, 2 and 3 ms. However, if enough photons are collected, one can also look at the MFD analysis using time windows. Figure 12 shows a comparison between a burstwise based analysis and a time window based analysis for measurements with the OFA. It is clear that the burstwise analysis shows a FRET population mainly off the static FRET line. In contrast, the FRET population is mainly on the static FRET line in the time window-based analysis. This means that dynamical averaging can be avoided at binning times equal to or lower than 200  $\mu$ s.

We took this idea further to study FRET efficiency trajectories. Figure 13 shows two such measurements at different  $\text{Mg}^{2+}$  concentrations. Figures 13a and 13e show FRET efficiency trajectories assembled from 70 individual bursts using 0.2 and 0.5 mM  $\text{Mg}^{2+}$ , respectively. Moreover, the FRET efficiency trajectories were analyzed with an HMM where only two states were sufficient to fit the experimental model appropriately. Figure 13b shows a PDA with TWs of the same size as the time binning (50  $\mu$ s). It can be seen that the HF state is most occupied. This is decreased as more  $\text{Mg}^{2+}$  is added (see Fig. 13f). The exponential decay of the level duration of the HF and MF states shows a longer relaxation time in the presence of more  $\text{Mg}^{2+}$ , as expected. This can be seen by comparing Figs. 13c and 13g or 13d and 13h. These observations indicate that with the OFA, it is possible to resolve FRET efficiency levels and their trajectory from single-molecule bursts of freely diffusing biomolecules.

To further test and validate this approach, data were generated for high excitation rates by setting the brightness of the molecules to  $Q = 500$  kcpm (kilo counts per molecule) in the case with OFA (see Fig. 14a), and  $Q = 150$  kcpm without OFA (b). The relaxation times of the levels were obtained experimentally (see Fig. 13). The HMM algorithm fails to find a reasonable amount of HF states in case of no OFA due to an insufficient number of photons. A close-up of the simulated signal obtained with the OFA is shown in (c). Here, it is evident that the FRET efficiency levels are identifiable “by eye”. Thus, they are easily fitted with the HMM algorithm, whereas, without the OFA, the FRET efficiency is too noisy for the HMM algorithm to converge (see Fig. 14d). The analysis using HMM finds a distribution width of  $\sigma_{\text{efficiency}} = 0.14$  in the case of an OFA and  $\sigma_{\text{efficiency}} = 0.32$  in open solution.

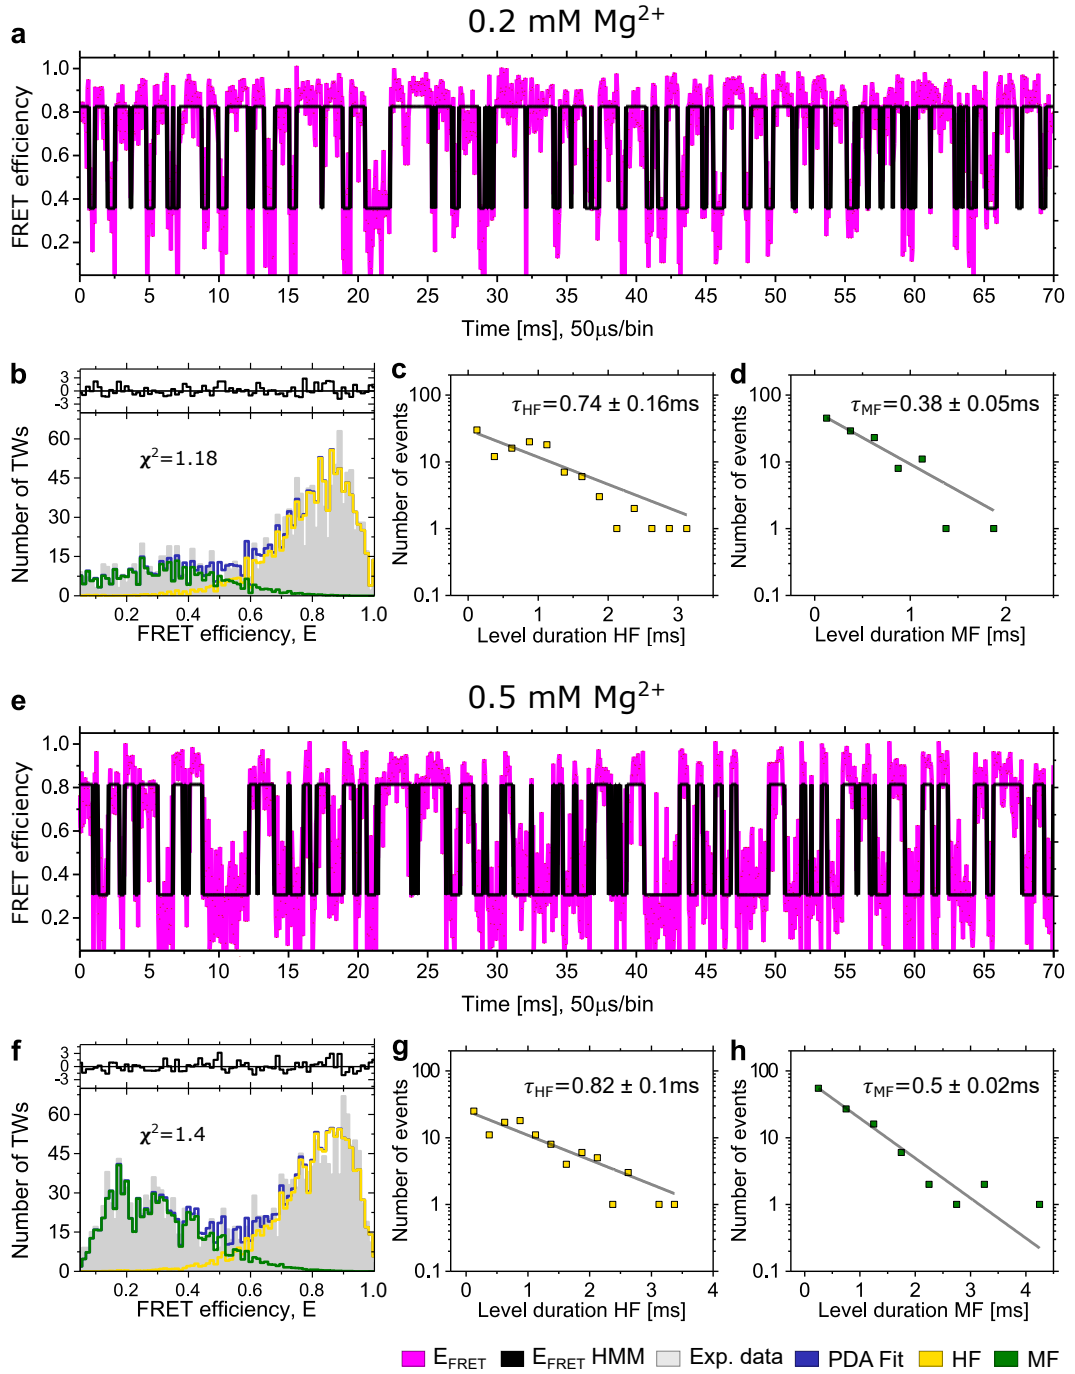

Figure 13. **Holliday Junction FRET Efficiency trajectory analysis at different  $\text{Mg}^{2+}$  concentrations.** **a**, FRET efficiency trajectory consisting of single bursts measured in a buffer at 0.2 mM  $\text{Mg}^{2+}$  concentration. The efficiency levels (black curve) were fitted using a HMM algorithm. **b**, Histogram of the trajectory shown in **a** which has been divided into time windows with a binning size of 50  $\mu\text{s}$ . The resulting histogram is then fitted using PDA. The dark-green distribution shows the MF-state of the HJ and the yellow distribution shows the HF-state of the HJ. The figures **c** and **d** show the distribution of the level durations of the HF-state (**c**) and the MF-state (**d**) in a semi logarithmic plot. The distribution was fitted using an exponential decay without an offset (gray curve). **e**, FRET efficiency trajectory consisting of single bursts measured in a buffer (0.5 mM  $\text{Mg}^{2+}$  concentration). **f**, Resulting histogram from **e** with PDA using time windows with 50  $\mu\text{s}$  binning time. The figures **g** and **h** show the distribution of the level durations of the HF-state (**g**) and the MF-state (**h**) in a semi logarithmic plot.

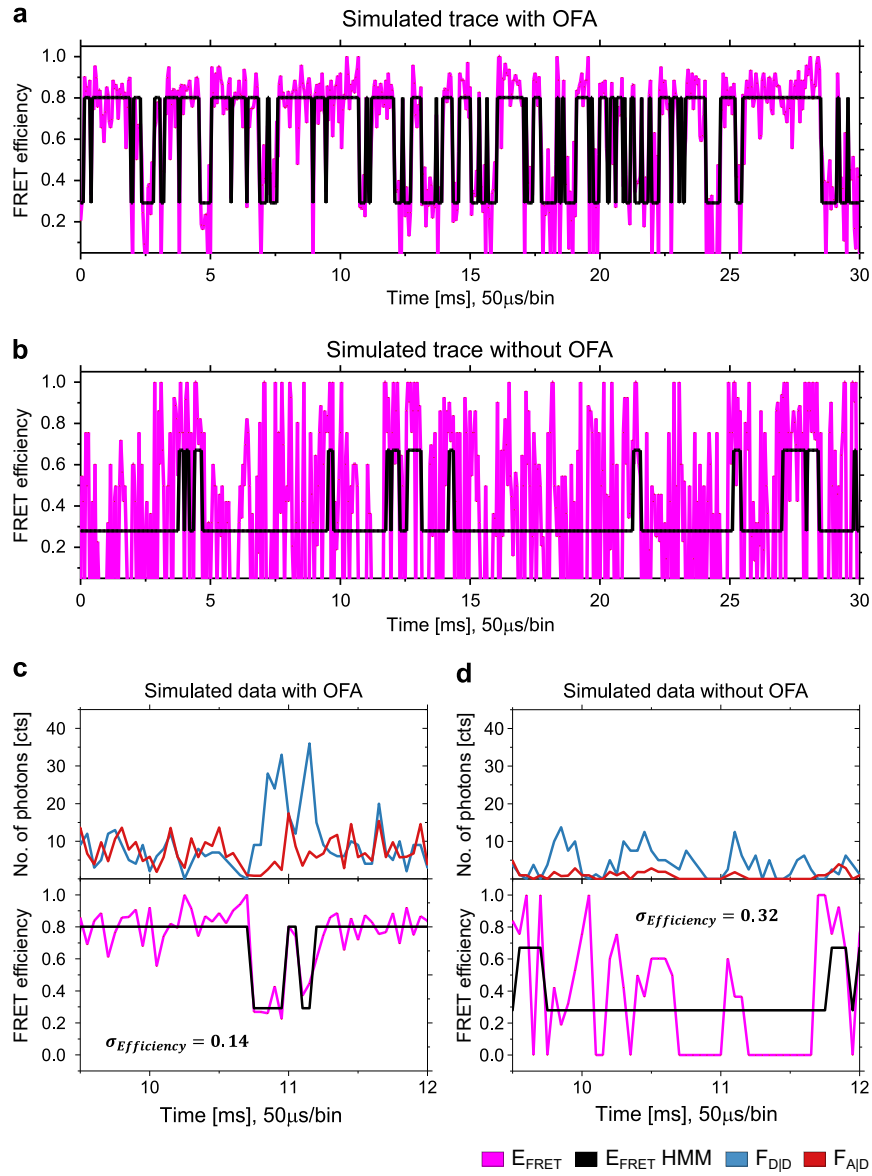

Figure 14. **Simulated FRET Efficiency trajectories with and without OFA.** **a**, FRET efficiency trajectory simulated considering the rates obtained from measurements at 0.2mM  $\text{Mg}^{2+}$  concentration. In the simulation we use a two state model for the HF and MF states of the HJ. Sm-bursts were filtered for a minimum burst duration of 0.8ms and merged to a single trajectory lasting around 70ms. FRET levels were fitted using a HMM algorithm. **b**, The same simulation as in **a** was repeated using molecules with 1/4 of the brightness to mimic the case of no OFA. FRET efficiency was fitted again using a HMM algorithm. Figures **c** and **d** show a close-up in the FRET efficiency trajectory with the OFA (**c**) and without the OFA (**d**). The top panel in both plots show the FRET efficiency trajectory of the fluorescence for the donor under donor excitation  $F_{D|D}$  and the fluorescence of the acceptor under donor excitation  $F_{A|D}$ . The resulting  $\sigma_{\text{efficiency}}$  obtained from the HMM-fit is indicated in each plot.



- 
- [1] Novotny, L. & Hecht., B. *Principles of Nano-Optics*. (Cambridge University Press, New York, United States, 2006).
- [2] Qian, H. & Elson, E. L. Analysis of confocal laser-microscope optics for 3-d fluorescence correlation spectroscopy. *Appl. Opt.* **30**, 1185–1195 (1991).
- [3] Mortensen, K. I., Churchman, L. S., Spudich, J. A. & Flyvbjerg, H. Optimized localization analysis for single-molecule tracking and super-resolution microscopy. *Nat. Methods.* **7**, 377–381 (2010).
- [4] Felekyan, S., Kalinin, S., Sanabria, H., Valeri, A. & Seidel, C. A. M. Filtered fcs: Species auto- and cross-correlation functions highlight binding and dynamics in biomolecules. *ChemPhysChem* **13**, 1036–1053 (2012).
- [5] Rigler, R., Mets, U., Widengren, J. & Kask, P. Fluorescence correlation spectroscopy with high count rate and low background: analysis of translational diffusion. *Eur. Biophys. J.* **22** (1993).
- [6] Basché, T., Moerner, W. E., Orrit, M. & Wild, U. P. *Single-Molecule Optical Detection, Imaging and Spectroscopy* (Wiley-VCH Verlag GmbH & Co. KGaA, Weinheim, Germany, 2008).
- [7] Widengren, J. Single-molecule detection and identification of multiple species by multiparameter fluorescence detection. *Anal. Chem.* **78**, 2039–2050 (2006).
- [8] Kudryavtsev, V. *et al.* Combining mfd and pie for accurate single-pair förster resonance energy transfer measurements. *ChemPhysChem* **13**, 1060–1078 (2012).
- [9] Hendrix, J. & Lamb, D. C. Pulsed interleaved excitation. *Meth. Enzymol.* 205–243 (2013).
- [10] Kalinin, S. *et al.* A toolkit and benchmark study for fret-restrained high-precision structural modeling. *Nat. Methods* **9**, 1218–1225 (2012).
- [11] Lakowicz, J. R. *Principles of fluorescence spectroscopy* (Springer, New York, United States, 2006).
- [12] Kalinin, S., Valeri, A., Antonik, M., Felekyan, S. & Seidel, C. A. M. Detection of structural dynamics by fret: A photon distribution and fluorescence lifetime analysis of systems with multiple states. *J. Phys. Chem. B* **114**, 7983–7995 (2010).
